# Supplementary material for: Barriers of comprehensive emergency obstetric and newborn care provision at health center level in Addis Ababa, Ethiopia: A qualitative study
Source: Research Square preprint supplement (doi:10.21203/rs.3.rs-8555602/v1), 2026-02-16
Supplement: Supplementary file 1 [file c4cbf9a8e43b4b870340707e.docx]

**Annexes**

Annex-1: **Interview guide for investigating barriers of Comprehensive Emergency obstetrics and surgical care at health center level**

Hello, I am Melese Takele a PhD candidate at Saint Paul hospital Millennium medical college. I would like to interview you to learn more about your experience as a CEO/regional or Minstry of health expert/surgeon/Anesthetist/Head nurse of OR department on the difficulties or challenges you are facing while providing emergency surgical and obstetric care at health center level. The interview will last about 30 minutes.

You can skip questions that you do not want to answer or stop the interview at any time. Data will be kept confidential. We will not share your personal information with anyone outside the research team. We will not use your name, or anything that can identify you. Being in this study is voluntary. Please tell me if you do not want to participate.

Any questions- Here is also my number and email if you have any questions.

Interviewee: CEO/Hospital Director, emergency surgical officers, anesthetist, operation room head nurse and experts from regional health bureau and ministry of health.

Name and title of interview subject:……………………………

Contact information:…………………………………………

Framing statement: The purpose of this interview is to understand the key factors affecting the provision of comprehensive emergency obstetricsand other emergency surgical care service at health level– from management and clinical practice perspective – within the facility. We would like to understand the challenges you face as well as the main areas for improvement at this facility?

**Infrastructure**:

1. Describe your facility’s infrastructure and how it affects your facility’s ability to provide comprehensive emergency obstetrics and other surgical care.
2. What are the key challenges your facility faces in terms of infrastructure?

**workforce**

1. Describe your facility’s human resources and how they affect your ability to provide comprehensive emergency obstetrics and surgical care.
2. Describe the working environment of your facility.
3. What are they key challenges your facility faces in terms of workforce?

**Service delivery**

1. Describe how your facility addresses or can improve quality of surgical care.
2. In what ways does your facility coordinate care with other partners (e.g other referral or teaching hospitals or NGOs)?
3. What concerns for quality of care at this facility do you have?

**Supply and Finance**

1. What issues with affordability do your patients face in accessing emergency obstetrics care?
2. What is the process of budgeting for maternal health care at your facility?
3. What are the key challenges your facility faces in terms of financing and supplies?

**Leadership and Information management**

1. Describe the ways in which the leadership and health information management systems affect your facility’s ability to provide comprehensive emergency obstetrics care?
2. How is the referral system?

**Conclusion**

1. Is there anything else you’d like to share with us?
2. Do you have any questions for me regarding this interview or the study we are doing?
